# Supplementary material
Source: Research Square preprint supplement (doi:10.21203/rs.3.rs-9236308/v1)
Supplement: Supplementary file 1 [file 088bc57fe3cf496bf8f6790d.xlsx]

## Sheet: Sheet1
Ordinal logistic regression of surgical procedures 1–5 and maximum torque for split pattern
Variable	β coefficient	Standard error	Odds ratio	95% confidence interval	P value
Surgical procedure 2 vs 1	-0.92111	1.1396	0.3981	0.0427-3.7155	0.419
Surgical procedure 3 vs 1	-1.76586	1.7244	0.171	0.0058-5.0227	0.3059
Surgical procedure 4 vs 1	-0.31795	2.4731	0.7276	0.0057-92.6961	0.8977
Surgical procedure 5 vs 1	-0.09624	3.4843	0.9082	0.0010-839.6524	0.978
Maximum torque	-0.10834	0.3467	0.8973	0.4548-1.7704	0.7546
Ordinal logistic regression results for the associations of surgical procedures 1–5 and maximum torque with split pattern.
