# Supplementary material
Source: Research Square preprint supplement (doi:10.21203/rs.3.rs-9236308/v1)
Supplement: Supplementary file 2 [file 4399b7596bd85c32e728305b.xlsx]

## Sheet: Sheet1
Ordinal logistic regression of surgical procedures 7–11 and maximum torque for split pattern
Variable	β coefficient	Standard error	Odds ratio	95% confidence interval	P value
Surgical procedure 8 vs 7	-2.3883	1.226	0.0918	0.0083-1.0148	0.0514
Surgical procedure 9 vs 7	-1.4279	1.437	0.2398	0.0143-4.0093	0.3204
Surgical procedure 10 vs 7	-2.5327	2.019	0.0794	0.0015-4.1559	0.2097
Surgical procedure 11 vs 7	-2.8828	2.323	0.056	0.0006-5.3137	0.2146
Maximum torque	-0.3059	0.276	0.7365	0.4288-1.2650	0.2677
Ordinal logistic regression results for the associations of surgical procedures 7–11 and maximum torque with split pattern.
