# Supplementary material
Source: Research Square preprint supplement (doi:10.21203/rs.3.rs-9236308/v1)
Supplement: Supplementary file 3 [file 89ec4a0308c28c0d05889190.xlsx]

## Sheet: Sheet1
Cochran–Mantel–Haenszel test statistics for surgical procedure and split pattern in mandibular models
Alternative hypothesis	Chi-square	Degrees of freedom	P value
Nonzero correlation	1.4374	1	0.2306
Row mean scores differ	9.633	10	0.4733
Column mean scores differ	7.9403	8	0.4393
General association	95.625	80	0.1122
